# Supplementary material for: Health for sale: the medicinal plant markets in Trujillo and Chiclayo, Northern Peru
Source: PubMed Central journal article supplement (PMC2245918; doi:10.1186/1746-4269-3-37), 2007-12-10
Supplement: 1746-4269-3-37-S2.pdf [file 1746-4269-3-37-S2.pdf]

Additional file 2. Quantities of medicinal plants traded in Trujillo and Chiclayo markets

| Family Name      | Species Name                                              | Common name           | Region               | Location      | Total quantity per week | Sales per week | Total quantity per year | Sales per year |
|------------------|-----------------------------------------------------------|-----------------------|----------------------|---------------|-------------------------|----------------|-------------------------|----------------|
| ACANTHACEAE      | <i>Fittonia</i> spp.                                      | Motalio               | Sierra               |               | 7                       | 7              | 364                     | 364            |
| ADIANTACEAE      | <i>Adiantum concinnum</i> Wild. ex H.B.K.                 | Culantrillo           | Sierra               | Huaraz        | 122                     | 122            | 6344                    | 6344           |
| ADIANTACEAE      | <i>Pellaea ternifolia</i> C. Chr.                         | Cuti Cuti             | Sierra               |               | 156                     | 156            | 8112                    | 8112           |
| AIZOACEAE        | <i>Tetragonia crystallina</i> L'Herit                     | Hierba de la Señorita | Sierra               |               | 34                      | 34             | 1768                    | 1768           |
| ALGAE            | <i>Giartina</i> spp.                                      | Algae Marinas         |                      |               | 17                      | 17             | 884                     | 884            |
| ALSTROEMERIACEAE | <i>Bomarea dulcis</i> (Hook.) Beauv.                      | Hierba de Gallo       | Sierra               |               | 7                       | 7              | 364                     | 364            |
| AMARANTHACEAE    | <i>Alternanthera brasiliana</i> (L.) Kuntze               | Hierba del Oso        | Sierra               |               | 17                      | 17             | 884                     | 884            |
| AMARANTHACEAE    | <i>Alternanthera halmifolia</i> (Lam.) Standley & Pittier | Morada                |                      |               | 17                      | 17             | 884                     | 884            |
| AMARANTHACEAE    | <i>Alternanthera porrigens</i> (Jacquin) Kuntze           | Moradilla             |                      |               | 274                     | 274            | 14248                   | 14248          |
| AMARANTHACEAE    | <i>Iresine herbstii</i> Lindley                           | Zangurache            | Sierra               |               | 31                      | 31             | 1612                    | 1612           |
| AMARYLLIDACEAE   | <i>Eustephia coccinea</i> Cav.                            | Puma Para             | Sierra               |               | 63                      | 63             | 3276                    | 3276           |
| ANACARDIACEAE    | <b><i>Mauria heterophylla</i> H.B.K.</b>                  | <b>Feregreco</b>      | <b>Costa, Sierra</b> | <b>Otusco</b> | <b>401</b>              | <b>401</b>     | <b>20852</b>            | <b>20852</b>   |
| ANACARDIACEAE    | <i>Schinus molle</i> L.                                   | Molle                 | Costa                | Trujillo      | 43                      | 43             | 2236                    | 2236           |
| ANNONACEAE       | <i>Annona muricata</i> L.                                 | Guanabana             |                      |               | 217                     | 217            | 11284                   | 11284          |
| APIACEAE         | <i>Ammi visnaga</i> (L.) Lam.                             | Bisnaga               | Sierra               |               | 17                      | 17             | 884                     | 884            |
| APIACEAE         | <b><i>Apium graveolens</i> L.</b>                         | <b>Apio</b>           | <b>Sierra</b>        |               | <b>89</b>               | <b>89</b>      | <b>4626</b>             | <b>4626</b>    |
| APIACEAE         | <i>Arracacia xanthorrhiza</i> Bancroft                    | Racacha               | Sierra               |               | 7                       | 7              | 364                     | 364            |
| APIACEAE         | <b><i>Coriandrum sativum</i> L.</b>                       | <b>Culantro</b>       |                      |               | <b>12</b>               | <b>12</b>      | <b>624</b>              | <b>624</b>     |
| APIACEAE         | <i>Daucus montanus</i> H. & B. ex Spreng.                 | Hierba de Zorrillo    | Sierra               |               | 7                       | 7              | 364                     | 364            |
| APIACEAE         | <b><i>Foeniculum vulgare</i> P. Miller</b>                | <b>Hinojo</b>         | <b>Sierra</b>        |               | <b>89</b>               | <b>89</b>      | <b>4626</b>             | <b>4626</b>    |
| APIACEAE         | <b><i>Petroselinum crispum</i> (Miller) A.W. Hill</b>     | <b>Perejil</b>        | <b>Sierra</b>        |               | <b>58</b>               | <b>58</b>      | <b>3016</b>             | <b>3016</b>    |
| APIACEAE         | <b><i>Pimpinella anisum</i> L.</b>                        | <b>Anis</b>           | <b>Sierra</b>        | <b>Otusco</b> | <b>973</b>              | <b>973</b>     | <b>50596</b>            | <b>50596</b>   |
| APOCYNACEAE      | <i>Mandevilla</i> cf. <i> trianae</i> Woodson             | Bejuco                | Sierra               |               | 17                      | 17             | 884                     | 884            |
| APOCYNACEAE      | <b><i>Nerium oleander</i> L.</b>                          | <b>Laurel</b>         | <b>Sierra</b>        |               | <b>86</b>               | <b>86</b>      | <b>4472</b>             | <b>4472</b>    |

|                       |                                                      |                  |               |               |     |     |       |       |
|-----------------------|------------------------------------------------------|------------------|---------------|---------------|-----|-----|-------|-------|
| <b>APOCYNACEAE</b>    | <i>Plumeria rubra</i> L.                             | Patchouli        | Sierra        |               | 17  | 17  | 884   | 884   |
| <b>APOCYNACEAE</b>    | <i>Thevetia peruviana</i> (Pers.) Schum.             | Maichil          | Costa         | Moche         | 212 | 212 | 11024 | 11024 |
| <b>APOCYNACEAE</b>    | <i>Vallesia glabra</i> (Cav.) Link.                  | Cuncuno          | Sierra        |               | 7   | 7   | 364   | 364   |
| <b>AQUIFOLIACEAE</b>  | <i>Ilex guayusa</i> Loes                             | Citrodora        | Sierra        |               | 215 | 215 | 11180 | 11180 |
| <b>ARALIACEAE</b>     | <i>Oreopanax eriocephalus</i> Harms                  | Mano de León     | Sierra        |               | 57  | 57  | 2964  | 2964  |
| <b>ARALIACEAE</b>     | <i>Panax ginseng</i> Mey.                            | Ginseng          | Sierra        |               | 17  | 17  | 884   | 884   |
| <b>ARECACEAE</b>      | <i>Bactris</i> spp.                                  | Chonta           | Sierra        |               | 7   | 7   | 364   | 364   |
| <b>ASCLEPIADACEAE</b> | <i>Sarcostemma clausum</i> (Jacquin) Schultes        | Marrajudio       |               |               | 10  | 10  | 520   | 520   |
| <b>ASPHODELACEAE</b>  | <i>Aloe vera</i> (L.) Burm f.                        | Hojas de Sabila  |               | Chiclayo      | 382 | 382 | 19864 | 19864 |
| <b>ASTERACEAE</b>     | <i>Acanthoxanthium spinosum</i> (L.) Furreau         | Juan Alonso      | Costa, Sierra | Moche, Otuzco | 70  | 70  | 3640  | 3640  |
| <b>ASTERACEAE</b>     | <i>Achillea millefolium</i> L.                       | Milenrama        | Sierra        |               | 41  | 41  | 2132  | 2132  |
| <b>ASTERACEAE</b>     | <i>Ambrosia peruviana</i> Willd.                     | Altamisa         | Costa, Sierra |               | 169 | 169 | 8788  | 8788  |
| <b>ASTERACEAE</b>     | <i>Baccharis genistelloides</i> (Lam.) Pers.         | Karqueja         | Sierra        | Otusco        | 318 | 318 | 16536 | 16536 |
| <b>ASTERACEAE</b>     | <i>Baccharis vaccinioides</i> H.B.K.                 | Sigueme Sigueme  | Sierra        |               | 27  | 27  | 1404  | 1404  |
| <b>ASTERACEAE</b>     | <i>Bidens pilosa</i> L.                              | Amor Seco        |               |               | 77  | 77  | 4004  | 4004  |
| <b>ASTERACEAE</b>     | <i>Calendula officinalis</i> L.                      | Calendula        | Sierra        |               | 7   | 7   | 364   | 364   |
| <b>ASTERACEAE</b>     | <i>Chuquiraga spinosa</i> sp. huamanpinta C. Ezcurra | Huamanpinta      | Sierra        | Huaraz        | 164 | 164 | 8528  | 8528  |
| <b>ASTERACEAE</b>     | <i>Chuquiragua weberbaueri</i> Tovar                 | Amaro            | Sierra        | Otusco        | 82  | 82  | 4264  | 4264  |
| <b>ASTERACEAE</b>     | <i>Cronquistianthus lavandulifolius</i> DC.          | Pulmonaria       | Sierra        | Otusco        | 240 | 240 | 12480 | 12480 |
| <b>ASTERACEAE</b>     | <i>Cynara cardunculus</i> L.                         | Alcachofa        | Costa         | Moche         | 232 | 232 | 12064 | 12064 |
| <b>ASTERACEAE</b>     | <i>Diplostephium sagasteguii</i> Cuatrecasas         | Hierba del Tigre | Sierra        |               | 7   | 7   | 364   | 364   |
| <b>ASTERACEAE</b>     | <i>Eupatorium gayanum</i> Wedd.                      | Asma chilca      | Sierra        | Cajamarca     | 125 | 125 | 6500  | 6500  |
| <b>ASTERACEAE</b>     | <i>Eupatorium triplinerve</i> Wedd.                  | Chilco           | Costa         |               | 22  | 22  | 1144  | 1144  |
| <b>ASTERACEAE</b>     | <i>Flaveria bidentis</i> (L.) Kuntze                 | Mata Gusano      | Costa         | Trujillo      | 26  | 26  | 1352  | 1352  |
| <b>ASTERACEAE</b>     | <i>Gnaphalium americanum</i> Mill.                   | Lechugilla       | Sierra        | Huaraz        | 53  | 53  | 2756  | 2756  |

|            |                                                         |                       |                      |                             |             |             |               |               |
|------------|---------------------------------------------------------|-----------------------|----------------------|-----------------------------|-------------|-------------|---------------|---------------|
| ASTERACEAE | <i>Loricaria ferruginea</i> (R. & P.) Wedd.             | Palmita               | Sierra               | Jalca, Huancabamba          | 10          | 10          | 520           | 520           |
| ASTERACEAE | <i>Loricaria pauciflora</i> Cuatr.                      | Palma Bendita         | Sierra               |                             | 27          | 27          | 1404          | 1404          |
| ASTERACEAE | <i>Loricaria thyrsoidea</i> (Cuatr.) Dillon             | Trensilla             | Sierra               |                             | 20          | 20          | 1040          | 1040          |
| ASTERACEAE | <b><i>Matricaria recutita</i> L.</b>                    | <b>Manzanilla</b>     | <b>Sierra</b>        | <b>Cajamarca y Chiclayo</b> | <b>3787</b> | <b>3787</b> | <b>196924</b> | <b>196924</b> |
| ASTERACEAE | <i>Monactis flaverioides</i> H.B.K.                     | Hierba del Susto      | Sierra               |                             | 92          | 92          | 4784          | 4784          |
| ASTERACEAE | <b><i>Oritrophium peruvianum</i> (Lam.) Cuatrec.</b>    | <b>Vira Vira</b>      | <b>Costa, Sierra</b> | <b>Otusco</b>               | <b>441</b>  | <b>441</b>  | <b>22932</b>  | <b>22932</b>  |
| ASTERACEAE | <i>Paranephelius uniflorus</i> Poepp. & Endl.           | Carapa de Chancho     | Sierra               |                             | 41          | 41          | 2132          | 2132          |
| ASTERACEAE | <b><i>Perezia multiflora</i> (H. &amp; B.) Lesing</b>   | <b>Escorcionera</b>   | <b>Sierra</b>        | <b>Cajamarca</b>            | <b>593</b>  | <b>593</b>  | <b>30836</b>  | <b>30836</b>  |
| ASTERACEAE | <i>Perezia pungens</i> (H.B.K.) Cas.                    | Lengua Vaca           | Sierra               |                             | 7           | 7           | 364           | 364           |
| ASTERACEAE | <i>Picrosia longifolia</i> D. Don                       | Achicoria             | Costa                | Moche                       | 120         | 120         | 6240          | 6240          |
| ASTERACEAE | <i>Porophyllum ruderale</i> (Jacq.) Cas.                | Gallinazo             | Costa                |                             | 155         | 155         | 8060          | 8060          |
| ASTERACEAE | <i>Pseudogynoxis cordifolia</i> (Cass.) Cabr.           | San Juan              | Sierra               |                             | 34          | 34          | 1768          | 1768          |
| ASTERACEAE | <b><i>Schkuhria pinnata</i> (Lam.) Kuntze</b>           | <b>Canchalagua</b>    | <b>Sierra</b>        | <b>Otusco</b>               | <b>758</b>  | <b>758</b>  | <b>39416</b>  | <b>39416</b>  |
| ASTERACEAE | <i>Senecio canescens</i> (H.B.K.) Cuatrecasas           | Oreja de Conejo       | Sierra               | Sierra                      | 7           | 7           | 364           | 364           |
| ASTERACEAE | <i>Senecio chinogeton</i> Wedd.                         | Hornamo Leon Amarillo | Sierra               |                             | 20          | 20          | 1040          | 1040          |
| ASTERACEAE | <i>Senecio pseudotites</i> Grieseb.                     | Arnica                | Sierra               |                             | 21          | 21          | 1092          | 1092          |
| ASTERACEAE | <i>Smallanthus sonchifolius</i> (Poepp. & Endl) H. Rob. | Yacon                 | Sierra               | Otusco                      | 50          | 50          | 2600          | 2600          |
| ASTERACEAE | <b><i>Sonchus oleraceus</i> L.</b>                      | <b>Serraja</b>        | <b>Costa</b>         | <b>Costeña</b>              | <b>126</b>  | <b>126</b>  | <b>6552</b>   | <b>6552</b>   |
| ASTERACEAE | <i>Spilanthes leiocarpa</i> DC.                         | Turre                 |                      |                             | 10          | 10          | 520           | 520           |
| ASTERACEAE | <i>Stevia</i> sp.                                       | Estevia               | Sierra               | San Ignacio, Cajamarca      | 121         | 121         | 6292          | 6292          |
| ASTERACEAE | <i>Tagetes erecta</i> L.                                | Claveles Chino        | Sierra               | Viru                        | 87          | 87          | 4524          | 4524          |
| ASTERACEAE | <i>Tagetes filifolia</i> Lag.                           | Anis Serrano          | Sierra               |                             | 24          | 24          | 1248          | 1248          |
| ASTERACEAE | <i>Tanacetum parthenium</i> (L.) Sch. Bip.              | Santa Marta           | Sierra               |                             | 7           | 7           | 364           | 364           |

|                   |                                                                         |                        |                  |                  |            |            |              |              |
|-------------------|-------------------------------------------------------------------------|------------------------|------------------|------------------|------------|------------|--------------|--------------|
| <b>ASTERACEAE</b> | <i>Taraxacum officinale</i><br>Wiggers                                  | Diente de Leon         | Costa,<br>Sierra |                  | 181        | 181        | 9412         | 9412         |
| ASTERACEAE        | <i>Tegetes elliptica</i> Sm.                                            | Supequewa              |                  |                  | 19         | 19         | 988          | 988          |
| ASTERACEAE        | <i>Tesaria integrifolia</i> R. & P.                                     | Pajaro Bobo            | Costa            | Moche            | 104        | 104        | 5408         | 5408         |
| ASTERACEAE        | <i>Trixis cacalioides</i> H.B.K.                                        | Añasquero<br>Chico     | Sierra           |                  | 7          | 7          | 364          | 364          |
| ASTERACEAE        | <i>Weddelia latifolia</i> DC.                                           | Chulgan                | Sierra           |                  | 12         | 12         | 624          | 624          |
| BALANOPHORACEAE   | <i>Heliosis cayennensis</i><br>(Swartz) Sprengel                        | Huanarpo               | Sierra           |                  | 36         | 36         | 1872         | 1872         |
| BALSAMIACEAE      | <i>Impatiens balsamina</i> L.                                           | Balsamina              | Sierra           |                  | 7          | 7          | 364          | 364          |
| BERBERIDACEAE     | <i>Berberis buceronis</i> J.F.<br>Macbride                              | Palo Amarillo          | Sierra           |                  | 14         | 14         | 728          | 728          |
| BETULACEAE        | <i>Alnus acuminata</i> H.B.K.                                           | Aliso                  | Sierra           |                  | 21         | 21         | 1092         | 1092         |
| BIGNONIACEAE      | <i>Crescentia cujete</i> L.                                             | Tutuma                 | Sierra           |                  | 39         | 39         | 2028         | 2028         |
| BIGNONIACEAE      | <i>Jacaranda acutifolia</i> H. &<br>B.                                  | Yarabisca              | Sierra           |                  | 29         | 29         | 1508         | 1508         |
| BIGNONIACEAE      | <i>Tabebuia</i> spp.                                                    | Huayacán               | Sierra           |                  | 7          | 7          | 364          | 364          |
| BIGNONIACEAE      | <i>Tynnanthus scabra</i><br>(Hoffm. ex Roem. &<br>Schult.) Schum.       | Clavo Huasca           | Sierra           |                  | 24         | 24         | 1248         | 1248         |
| BIXACEAE          | <b><i>Bixa orellana</i> L.</b>                                          | <b>Achote</b>          | <b>Selva</b>     | <b>Baja</b>      | <b>528</b> | <b>528</b> | <b>27456</b> | <b>27456</b> |
| BORAGINACEAE      | <b><i>Borrago officinalis</i> L.</b>                                    | <b>Borraja</b>         | <b>Sierra</b>    | <b>Otusco</b>    | <b>360</b> | <b>360</b> | <b>18720</b> | <b>18720</b> |
| BORAGINACEAE      | <i>Cordia alliodora</i> (R. & P.)<br>Oken                               | Hojas de Ajo<br>Sacha  | Selva            |                  | 33         | 33         | 1716         | 1716         |
| BORAGINACEAE      | <b><i>Cordia lutea</i> Lam.</b>                                         | <b>Flor de Overo</b>   | <b>Costa</b>     | <b>Chiclayo</b>  | <b>960</b> | <b>960</b> | <b>49920</b> | <b>49920</b> |
| BORAGINACEAE      | <i>Heliotropium</i><br><i>curassavicum</i> L.                           | Alacran                | Sierra           | Cajamarca        | 14         | 14         | 728          | 728          |
| BORAGINACEAE      | <i>Symphytum</i> spp.                                                   | Confrey                | Sierra           |                  | 7          | 7          | 364          | 364          |
| BORAGINACEAE      | <b><i>Tiquilia paronychoides</i></b><br><b>(Phil.) Rich.</b>            | <b>Flor de Arena</b>   | <b>Costa</b>     |                  | <b>528</b> | <b>528</b> | <b>27456</b> | <b>27456</b> |
| BRASSICACEAE      | <b><i>Capsella bursa-pastoris</i> (L.)<br/>Medic.</b>                   | <b>Bolsa de Pastor</b> | <b>Sierra</b>    |                  | <b>51</b>  | <b>51</b>  | <b>2652</b>  | <b>2652</b>  |
| BRASSICACEAE      | <i>Cheiranthus cheiri</i> L.                                            | Alalali                | Sierra           |                  | 7          | 7          | 364          | 364          |
| BRASSICACEAE      | <i>Lepidium meyenii</i><br>Walpers                                      | Maca                   | Sierra           |                  | 59         | 59         | 3068         | 3068         |
| BRASSICACEAE      | <b><i>Rorippa nasturtium-</i></b><br><b><i>aquaticum</i> (L.) Hayek</b> | <b>Berruco</b>         | <b>Sierra</b>    |                  | <b>98</b>  | <b>98</b>  | <b>5096</b>  | <b>5096</b>  |
| BROMELIACEAE      | <i>Puya hamata</i> L.B. Sm.                                             | Hierba de<br>Carnero   | Sierra           |                  | 75         | 75         | 3900         | 3900         |
| BROMELIACEAE      | <b><i>Tillandsia cacticola</i> L.B.<br/>Sm.</b>                         | <b>Siempre Viva</b>    | <b>Sierra</b>    | <b>Cajamarca</b> | <b>893</b> | <b>893</b> | <b>46436</b> | <b>46436</b> |

|                        |                                                                         |                         |                  |                   |     |     |       |       |
|------------------------|-------------------------------------------------------------------------|-------------------------|------------------|-------------------|-----|-----|-------|-------|
| <b>BURSERACEAE</b>     | <i>Bursera graveolens</i><br>(H.B.K.) Triana &<br>Planchon              | Palo Santo              | Sierra           |                   | 76  | 76  | 3952  | 3952  |
| <b>CACTACEAE</b>       | <i>Echinopsis pachanoi</i><br>(Britton & Rose) Friedrich<br>& G. Rowley | San Pedro               | Sierra           | Huamachuc<br>o    | 89  | 89  | 4628  | 4628  |
| <b>CACTACEAE</b>       | <i>Opuntia ficus-indica</i> (L.)<br>Miller                              | Tuna                    |                  |                   | 30  | 30  | 1560  | 1560  |
| <b>CAMPANULACEAE</b>   | <i>Siphocampylus</i><br><i>angustiflorus</i><br>Schlechtendal           | Contoya                 | Sierra           |                   | 52  | 52  | 2704  | 2704  |
| <b>CAPPARIDACEAE</b>   | <i>Capparis crotonoides</i><br>H.B.K.                                   | Bichayo                 | Selva            |                   | 24  | 24  | 1248  | 1248  |
| <b>CAPRIFOLIAEAE</b>   | <i>Lonicera japonica</i><br>Thunberg                                    | Madre Selva             | Sierra           |                   | 3   | 33  | 1716  | 1716  |
| <b>CAPRIFOLIAEAE</b>   | <i>Sambucus peruviana</i> HBK                                           | Sauco                   | Costa,<br>Sierra | Moche             | 228 | 228 | 11856 | 11856 |
| <b>CARICACEAE</b>      | <i>Jacartia digitata</i> (Poepp. &<br>Endl.) Solms-Lang.                | Contra<br>Hechizo       | Sierra           |                   | 47  | 47  | 2444  | 2444  |
| <b>CARYOPHYLLACEAE</b> | <i>Dianthus caryophyllus</i> L.                                         | Claveles                | Costa,<br>Sierra |                   | 210 | 210 | 10920 | 10920 |
| <b>CHENOPODIACEAE</b>  | <i>Chenopodium</i><br><i>ambrosioides</i> L.                            | Paico                   | Costa            | Moche             | 82  | 82  | 4264  | 4264  |
| <b>CHLORANTHACEAE</b>  | <i>Hedyosmum racemosum</i><br>(R. & P.) G. Don.                         | Asarcito                | Sierra           |                   | 31  | 31  | 1612  | 1612  |
| <b>CLETHRACEAE</b>     | <i>Clethra castaneifolia</i><br>Meissner                                | Hierba del<br>Olvido    | Sierra           |                   | 81  | 81  | 4212  | 4212  |
| <b>CLUSIACEAE</b>      | <i>Clusia minor</i> L.                                                  | Churguis                | Sierra           | Otusco,<br>Uzquil | 48  | 48  | 2496  | 2496  |
| <b>CLUSIACEAE</b>      | <i>Hypericum laricifolium</i><br>Jus.                                   | Hierba de la<br>Fortuna | Sierra           |                   | 14  | 14  | 728   | 728   |
| <b>CLUSIACEAE</b>      | <i>Hypericum silenoides</i> Jus.                                        | Sentaura                | Sierra           | Otusco            | 24  | 24  | 1248  | 1248  |
| <b>COMMELINACEAE</b>   | <i>Tripogandra multiflora</i><br>(Sw.) Raf.                             | Cachurros               | Sierra           |                   | 7   | 7   | 364   | 364   |
| <b>CRASSULACEAE</b>    | <i>Echeveria peruviana</i> Meyen                                        | Pinpin                  | Sierra           |                   | 78  | 78  | 4056  | 4056  |
| <b>CUCURBITACEAE</b>   | <i>Sicana odorifera</i> (Vell.)<br>Naud.                                | Secana                  | Sierra           |                   | 53  | 53  | 2756  | 2756  |
| <b>CUPRESSACEAE</b>    | <i>Cupressus lusitanica</i> Miller                                      | Cipres                  | Costa            | Moche             | 40  | 40  | 2080  | 2080  |
| <b>CYPERACEAE</b>      | <i>Cyperus articulatus</i> L.                                           | Varita de San<br>Jose   | Costa            |                   | 24  | 24  | 1248  | 1248  |
| <b>CYPERACEAE</b>      | <i>Oreobolus goeppingeri</i><br>Sues                                    | Carpintero              | Sierra           |                   | 7   | 7   | 364   | 364   |
| <b>DIOSCOREACEAE</b>   | <i>Dioscorea tambillensis</i>                                           | Papa Semitona           |                  |                   | 36  | 36  | 1872  | 1872  |

|                        |                                                                                                                    |                        |                      |                            |                                      |             |               |               |
|------------------------|--------------------------------------------------------------------------------------------------------------------|------------------------|----------------------|----------------------------|--------------------------------------|-------------|---------------|---------------|
|                        | Kunth                                                                                                              |                        |                      |                            |                                      |             |               |               |
| <b>DIOSCOREACEAE</b>   | <i>Dioscorea trifida</i> L.f.                                                                                      | Papa Pacta             | Sierra               | Otusco                     | 69                                   | 69          | 3588          | 3588          |
| <b>DIPSACACEAE</b>     | <i>Scabiosa atropurpurea</i> L.                                                                                    | Ambarina Negra         | Sierra               |                            | 47                                   | 47          | 2444          | 2444          |
| <b>EPHEDRACEAE</b>     | <i>Ephedra americana</i> H. & B.                                                                                   | Suelda con Suelda      | Sierra               | Otusco                     | 305                                  | 305         | 15860         | 15860         |
| <b>EQUISETACEAE</b>    | <i>Equisetum giganteum</i> (Wedd.) Ulbrich                                                                         | <b>Cola de Caballo</b> |                      | <b>Cajamarca</b>           | <b>3232</b>                          | <b>3232</b> | <b>168064</b> | <b>168064</b> |
| <b>ERICACEAE</b>       | <i>Bejaria aestuans</i> L.                                                                                         | <b>Cadillo</b>         | <b>Costa, Sierra</b> | <b>Feriñafen, Chiclayo</b> | <b>360</b>                           | <b>360</b>  | <b>18720</b>  | <b>18720</b>  |
| <b>ERICACEAE</b>       | <i>Gaultheria erecta</i> Vent.                                                                                     | Mullaca                | Sierra               | Otuzco                     | 327                                  | 327         | 17004         | 17004         |
| <b>ERYTHROXYLACEAE</b> | <i>Erythroxylon coca</i> Lam.                                                                                      | Coca                   | Sierra, Montaña      | Huamachuc o                | 277                                  | 277         | 14404         | 14404         |
| <b>EUPHORBIACEAE</b>   | <i>Alchornea castanaeifolia</i> (Willd.) Jussieu                                                                   | Ipurura                | Costa                | Chiclayo                   | 10                                   | 10          | 520           | 520           |
| <b>EUPHORBIACEAE</b>   | <i>Croton lechleri</i> Muell. Arg.                                                                                 | <b>Sangre de Grado</b> | <b>Selva</b>         |                            | <b>5331</b>                          | <b>5331</b> | <b>277161</b> | <b>277160</b> |
| <b>EUPHORBIACEAE</b>   | <i>Hura crepitans</i> L.                                                                                           | Coco de Abilla         |                      |                            | 10                                   | 10          | 520           | 520           |
| <b>EUPHORBIACEAE</b>   | <i>Jatropha curcas</i> L.                                                                                          | Piñones                |                      | Norte                      | 47                                   | 47          | 2444          | 2444          |
| <b>EUPHORBIACEAE</b>   | <i>Manhiot esculenta</i> Crantz                                                                                    | Yuca                   | Sierra               |                            | 7                                    | 7           | 364           | 364           |
| <b>EUPHORBIACEAE</b>   | <i>Phyllanthus niruri</i> L.,<br><i>Phyllanthus stipulatus</i> (Raf.) Webster, &<br><i>Phyllanthus urinaria</i> L. | <b>Chanca Piedra</b>   | <b>Montaña</b>       | <b>Iquitos, Juanjuil</b>   | <b>1053</b>                          | <b>1053</b> | <b>54556</b>  | <b>54756</b>  |
| <b>EUPHORBIACEAE</b>   | <i>Ricinus communis</i> L.                                                                                         | <b>Piñon</b>           | <b>Sierra</b>        |                            | <b>17</b>                            | <b>17</b>   | <b>884</b>    | <b>884</b>    |
| <b>FABACEAE</b>        | <i>Acacia senegal</i> (L.) Willd.                                                                                  | <b>Palo de Goma</b>    | <b>Sierra</b>        |                            | <b>27</b>                            | <b>27</b>   | <b>1404</b>   | <b>1404</b>   |
| <b>FABACEAE</b>        | <i>Caesalpinia paipai</i> R. & P.                                                                                  | Pai Pai                | Costa                | Moracon                    | 10                                   | 10          | 520           | 520           |
| <b>FABACEAE</b>        | <i>Caesalpinia spinosa</i> (Molina) Kuntze                                                                         | Talla                  | Sierra               |                            | 115                                  | 115         | 5980          | 5980          |
| <b>FABACEAE</b>        | <i>Cajanus cajan</i> (L.) Millsp.                                                                                  | Chivato                | Sierra               |                            | 12                                   | 12          | 624           | 624           |
| <b>FABACEAE</b>        | <i>Cassia fistula</i> L.                                                                                           | Caña Fistula           | Sierra               | Jaen                       | 27                                   | 27          | 1404          | 1404          |
| <b>FABACEAE</b>        | <i>Copaifera paupera</i> (Herz.) Dwyer.                                                                            | Copaiba                |                      |                            | 10                                   | 10          | 520           | 520           |
| <b>FABACEAE</b>        | <i>Desmodium molliculum</i> (H.B.K.) DC.                                                                           | <b>Pie de Perro</b>    | <b>Sierra</b>        | <b>Otusco</b>              | <b>813</b>                           | <b>813</b>  | <b>42276</b>  | <b>42276</b>  |
| <b>FABACEAE</b>        | <i>Erythrina</i> sp.                                                                                               | <b>Huayruro</b>        | <b>Montaña</b>       | <b>Jaén</b>                | <b>6660 seeds (3 seeds/ser ving)</b> | <b>2220</b> | <b>346320</b> | <b>115440</b> |
| <b>FABACEAE</b>        | <i>Lathyrus odoratus</i> L.                                                                                        | Tacon                  | Sierra               |                            | 7                                    | 7           | 364           | 364           |
| <b>FABACEAE</b>        | <i>Leucaena leucocephala</i> (Lam.) De Wit                                                                         | Arabisca               | Sierra               |                            | 51                                   | 51          | 2652          | 2652          |

|                 |                                                        |                     |                      |                    |            |            |              |              |
|-----------------|--------------------------------------------------------|---------------------|----------------------|--------------------|------------|------------|--------------|--------------|
| FABACEAE        | <i>Lupinus mutabilis</i> Sweet                         | Flor de Chocho      | Sierra               |                    | 50         | 50         | 2600         | 2600         |
| FABACEAE        | <i>Mimosa albida</i> H. & B.                           | Tapa Tapa           | Costa                |                    | 19         | 19         | 988          | 988          |
| FABACEAE        | <i>Mimosa polydactyla</i> H. & B.                      | Sensitiva           | Sierra               |                    | 7          | 7          | 364          | 364          |
| FABACEAE        | <i>Mucuna rostrata</i> Benth.                          | Habilla             | Sierra               | Baja               | 168        | 168        | 8736         | 8736         |
| FABACEAE        | <i>Myroxylon balsamum</i> (L.) Harms.                  | Quina Quina         | Montaña              |                    | 164        | 164        | 8528         | 8528         |
| FABACEAE        | <i>Quassia amara</i> L.                                | Cuasia              |                      |                    | 10         | 10         | 520          | 520          |
| FABACEAE        | <b><i>Senna monilifera</i> H.S. Irwin &amp; Bowley</b> | <b>Sen</b>          | <b>Costa, Sierra</b> | <b>Norteño</b>     | <b>393</b> | <b>393</b> | <b>20436</b> | <b>20436</b> |
| FABACEAE        | <i>Senna occidentalis</i> (L.) Link.                   | Retana              | Sierra               |                    | 67         | 67         | 3484         | 3484         |
| FABACEAE        | <b><i>Spartium junceum</i> L.</b>                      | <b>Retama</b>       | <b>Sierra</b>        | <b>Otusco</b>      | <b>853</b> | <b>853</b> | <b>20436</b> | <b>44356</b> |
| FABACEAE        | <b><i>Trifolium repens</i> L.</b>                      | <b>Trebol</b>       | <b>Sierra</b>        |                    | <b>48</b>  | <b>48</b>  | <b>2496</b>  | <b>2496</b>  |
| FABACEAE        | <i>Zornia reticulata</i> Sm.                           | Hierba de la Vibora | Sierra               | Cajamarca          | 44         | 44         | 2288         | 2288         |
| GENTIANACEAE    | <b><i>Gentianella bicolor</i> (Wedd.) J. Pringle</b>   | <b>Corpus Way</b>   | <b>Sierra</b>        | <b>Otusco</b>      | <b>592</b> | <b>592</b> | <b>30784</b> | <b>30784</b> |
| GENTIANACEAE    | <i>Gentianella crasicaulis</i> J. Pringle              | Hojas de Violeta    | Sierra               | Otuzco             | 10         | 10         | 520          | 520          |
| GENTIANACEAE    | <i>Gentianella dianthoides</i> (H.B.K.) Fabris         | Amargon             | Sierra               |                    | 64         | 64         | 3328         | 3328         |
| GENTIANACEAE    | <b><i>Gentianella graminea</i> (H.B.K.) Fabris</b>     | <b>Chinchimali</b>  | <b>Sierra</b>        |                    | <b>513</b> | <b>513</b> | <b>26676</b> | <b>26676</b> |
| GENTIANACEAE    | <b><i>Gentianella alborosea</i> (Grimes) Pringle</b>   | <b>Hercampuri</b>   | <b>Sierra</b>        | <b>Junin</b>       | <b>760</b> | <b>760</b> | <b>39520</b> | <b>39520</b> |
| GENTIANACEAE    | <i>Gentianella</i> sp.                                 | Anga Macha          | Sierra               |                    | 31         | 31         | 1612         | 1612         |
| GERANIACEAE     | <i>Erodium cicutarium</i> (L.) L'Herit.                | Agujilla            |                      |                    | 60         | 60         | 3120         | 3120         |
| GERANIACEAE     | <b><i>Geranium ayavacense</i> Willd ex H.B.K.</b>      | <b>Pachuchuaca</b>  | <b>Sierra</b>        | <b>Otusco</b>      | <b>620</b> | <b>620</b> | <b>32240</b> | <b>32240</b> |
| GERANIACEAE     | <i>Pelargonium odoratissimum</i> (L.) L'Herit.         | Malva de olor       | Sierra               | Cajamarca          | 49         | 49         | 2548         | 2548         |
| HIPPOCRATEACEAE | <i>Tontelea crassifolia</i> (Mart.) Spreng.            | Bejuco de Montaña   | Sierra               |                    | 7          | 7          | 364          | 364          |
| JUGLANDACEAE    | <i>Juglans neotropica</i> Diels                        | Nogal               | Sierra               | Otusco, Huamachuco | 133        | 133        | 6916         | 6916         |
| LAMIACEAE       | <i>Hyptis sidifolia</i> (L'Her.) Briq.                 | Albaca de Campo     | Sierra               |                    | 162        | 162        | 8424         | 8424         |
| LAMIACEAE       | <b><i>Lavandula angustifolia</i></b>                   | <b>Alhucema</b>     | <b>Sierra</b>        |                    | <b>41</b>  | <b>41</b>  | <b>2132</b>  | <b>2132</b>  |

|           |                                                  |                       |               |                          |                                   |      |       |       |
|-----------|--------------------------------------------------|-----------------------|---------------|--------------------------|-----------------------------------|------|-------|-------|
|           | Miller                                           |                       |               |                          |                                   |      |       |       |
| LAMIACEAE | <i>Lepechinia meyenii</i><br>(Walpers) Epling    | Salvia Real           | Sierra        |                          | 137                               | 137  | 7124  | 7124  |
| LAMIACEAE | <i>Marrubium vulgare</i> L.                      | Cordon de Muerto      | Sierra        | Otusco, Uzquil           | 238                               | 238  | 12376 | 12376 |
| LAMIACEAE | <i>Melisa officinalis</i> L.                     | Toronjil              | Sierra        | Cajamarca                | 880                               | 880  | 45760 | 45760 |
| LAMIACEAE | <i>Mentha spicata</i> L.                         | Menta                 | Sierra        | Otusco                   | 1337                              | 1337 | 69524 | 69524 |
| LAMIACEAE | <i>Mentha x piperita</i> L.                      | Poleo                 | Sierra        |                          | 57                                | 57   | 2964  | 2964  |
| LAMIACEAE | <i>Minthostachys mollis</i><br>Griesebach        | Muña                  | Serranilla    | Cajamarca                | 293                               | 293  | 15236 | 15236 |
| LAMIACEAE | <i>Ocimum basilicum</i> L.                       | Albaca                | Costa         | Moche                    | 208                               | 208  | 10816 | 10816 |
| LAMIACEAE | <i>Origanum majorana</i> L.                      | Mejorana              | Sierra        | Cajamarca                | 97                                | 97   | 5044  | 5044  |
| LAMIACEAE | <i>Origanum vulgare</i> L.                       | Oregano de Rama       | Sierra        | Otuzco                   | 207                               | 207  | 10764 | 10764 |
| LAMIACEAE | <i>Otholobium glandulosum</i><br>(L.) Grimes     | Culen                 | Sierra (alta) | La Jalca                 | 411                               | 411  | 21372 | 21372 |
| LAMIACEAE | <i>Rosmarinus officinalis</i> L.                 | Romero                | Costa, Sierra | Carjuan, Huaraz, Machuco | 706                               | 706  | 36712 | 36712 |
| LAMIACEAE | <i>Salvia discolor</i> H.B.K.                    | Llatama               | Sierra        |                          | 44                                | 44   | 2288  | 2288  |
| LAMIACEAE | <i>Salvia rosmarinifolia</i> Hort.<br>ex G. Don. | Romero Silvestre      | Sierra        |                          | 37                                | 37   | 1924  | 1924  |
| LAMIACEAE | <i>Salvia tubiflora</i> R. & P.                  | Hierba del (Mal) Aire | Sierra        |                          | 105                               | 105  | 5460  | 5460  |
| LAMIACEAE | <i>Satureja elliptica</i> (R. & P.)<br>Briq.     | Chipita               | Sierra        | Loreto, Iquitos          | 24                                | 24   | 1248  | 1248  |
| LAMIACEAE | <i>Satureja pulchella</i> (H.B.K.)<br>Briquet    | Panisara              | Sierra        | Cajamarca                | 107                               | 107  | 5564  | 5564  |
| LAMIACEAE | <i>Stachys arvensis</i> L.                       | Hierba Terrestre      | Sierra        |                          | 7                                 | 7    | 364   | 364   |
| LAMIACEAE | <i>Thymus vulgaris</i> L.                        | Tomillo               | Sierra        | Central                  | 155                               | 155  | 8060  | 8060  |
| LAURACEAE | <i>Aniba roseadora</i> Ducke                     | Palo Rosa             |               |                          | 12                                | 12   | 624   | 624   |
| LAURACEAE | <i>Nectandra</i> sp. 1                           | Acharachango          | Montaña       | Loreto, Iquitos          | 53 seeds<br>(3 seeds per serving) | 53   | 2756  | 2756  |
| LAURACEAE | <i>Nectandra</i> sp. 2                           | Asmala                | Montaña       |                          | 157 seeds (3 seeds per serving)   | 157  | 8164  | 8164  |

|                         |                                                          |                       |               |                         |                                  |      |       |       |
|-------------------------|----------------------------------------------------------|-----------------------|---------------|-------------------------|----------------------------------|------|-------|-------|
| <b>LAURACEAE</b>        | <i>Nectandra reticulata</i> (R. & P.) Mez.               | Espingo               | Montaña       | Bahua`                  | 1343 seeds (3 seeds per serving) | 448  | 69836 | 23296 |
| <b>LICHENES</b>         | <i>Siphula</i> sp.                                       | Papelillo             | Sierra        | Juaraz, Guamachuco      | 58                               | 58   | 3016  | 3016  |
| <b>LILIACEAE</b>        | <i>Allium sativum</i> L.                                 | Ajo Macho             | Sierra        |                         | 14                               | 14   | 728   | 728   |
| <b>LILIACEAE</b>        | <i>Hesperoziphium niveum</i> (Rav.) Rav.                 | Hierba de la Justicia | Sierra        |                         | 24                               | 24   | 1248  | 1248  |
| <b>LINACEAE</b>         | <i>Linum sativum</i> L. & <i>Linum usitatissimum</i> L.  | Linaza                | Sierra        | Cajamarca               | 853                              | 853  | 44356 | 44356 |
| <b>LOGANIACEAE</b>      | <i>Buddleja utilis</i> Kraenzl.                          | Flor Blanca           | Sierra        | Cajamarca               | 1780                             | 1780 | 92560 | 92560 |
| <b>LYCOPODIACEAE</b>    | <i>Huperzia crassa</i> (H. & B. ex Willd.) Rothm.        | Condor                | Sierra        |                         | 57                               | 57   | 2964  | 2964  |
| <b>LYCOPODIACEAE</b>    | <i>Lycopodium jussiaei</i> Desv. ex Poir                 | Hierba del Hombre     | Sierra        |                         | 7                                | 7    | 364   | 364   |
| <b>LYCOPODIACEAE</b>    | <i>Lycopodium thyoides</i> H. & B. ex Willd.             | Trencilla Roja        | Sierra        |                         | 14                               | 14   | 728   | 728   |
| <b>LYTHRACEAE</b>       | <i>Cuphea racemosa</i> (L.f.) Spreng.                    | Hierba del Coche      | Sierra        |                         | 7                                | 7    | 364   | 364   |
| <b>LYTHRACEAE</b>       | <i>Cuphea strigulosa</i> H.B.K.                          | Hierba del Toro       | Sierra        | Otusco                  | 314                              | 314  | 16328 | 16328 |
| <b>MALESHERBIACEAE</b>  | <i>Malesherbia ardens</i> J.F. Macbr.                    | Veronica              | Sierra        | Puno                    | 293                              | 293  | 15236 | 15236 |
| <b>MALPIGHIACEAE</b>    | <i>Banisteriopsis caapii</i> (Spruce ex Grieseb.) Morton | Ayahuasca             | Selva         |                         | 84                               | 84   | 4368  | 4368  |
| <b>MALVACEAE</b>        | <i>Abelmoschus moschatus</i> Medikus                     | Hierba de Culebra     | Sierra        |                         | 7                                | 7    | 364   | 364   |
| <b>MALVACEAE</b>        | <i>Alcea rosea</i> (L.) Cavanilles                       | Malva de Lavado       |               |                         | 10                               | 10   | 520   | 520   |
| <b>MALVACEAE</b>        | <i>Malva parviflora</i> L.                               | Malva real            | Costa         | Moche                   | 24                               | 24   | 1248  | 1248  |
| <b>MALVACEAE</b>        | <i>Malva sylvestris</i> L.                               | Malva Blanca          | Sierra, Costa | Otusco, Moche, Trujillo | 95                               | 95   | 4940  | 4940  |
| <b>MELASTOMATAACEAE</b> | <i>Brachyotum tyrianthium</i> Macbride                   | Sarcilleja            | Sierra        |                         | 14                               | 14   | 728   | 728   |
| <b>MELIACEAE</b>        | <i>Trichilia</i> sp.                                     | Pucho                 | Montaña       | Loreto, Iquitos         | 200 seeds (4 seeds per serving)  | 50   | 10400 | 2600  |
| <b>MENISPERMACEAE</b>   | <i>Abuta grandiflora</i> (Mart.) Sand.                   | Abuta                 | Sierra        |                         | 21                               | 21   | 1092  | 1092  |

|                       |                                                                                           |                       |               |                   |             |             |               |               |
|-----------------------|-------------------------------------------------------------------------------------------|-----------------------|---------------|-------------------|-------------|-------------|---------------|---------------|
| <b>MONIMIACEAE</b>    | <i>Peumus boldus</i> Molina                                                               | <b>Boldo</b>          | <b>Sierra</b> | <b>Chile</b>      | <b>2328</b> | <b>2328</b> | <b>121056</b> | <b>121056</b> |
| <b>MONIMIACEAE</b>    | <i>Siparuna muricata</i> (R. & P.) A. DC.                                                 | Añascero              | Sierra        |                   | 82          | 82          | 4264          | 4264          |
| <b>MORACEAE</b>       | <i>Brosmium rubescens</i> Taubert                                                         | Palo Sangre           | Sierra        |                   | 72          | 72          | 3744          | 3744          |
| <b>MORACEAE</b>       | <i>Ficus carica</i> L.                                                                    | Hoja de Higo          | Costa         | Trujillo          | 267         | 267         | 13884         | 13884         |
| <b>MORACEAE</b>       | <i>Morus alba</i> L.                                                                      | Morera                | Costa         | Moche             | 55          | 55          | 2860          | 2860          |
| <b>MUSACEAE</b>       | <i>Musa x paradisiaca</i> L.                                                              | Platano               |               |                   | 21          | 21          | 1092          | 1092          |
| <b>MYRICACEAE</b>     | <i>Myricaria dubia</i> (H.B.K.) McVaugh.                                                  | Camu Camu             | Sierra        |                   | 7           | 7           | 364           | 364           |
| <b>MYRISTICACEAE</b>  | <i>Myristica fragrans</i> L.                                                              | Nuez moscada          | Montaña       |                   | 100         | 100         | 5200          | 5200          |
| <b>MYRTACEAE</b>      | <i>Eucalyptus globulus</i> Labill.                                                        | <b>Eucalipto</b>      |               | <b>Cajamarca</b>  | <b>2626</b> | <b>2626</b> | <b>136552</b> | <b>136552</b> |
| <b>MYRTACEAE</b>      | <i>Eugenia obtusifolia</i> Cambes.                                                        | Lanchi                | Sierra        |                   | 185         | 185         | 9620          | 9620          |
| <b>MYRTACEAE</b>      | <i>Myrcianthes discolor</i> (H.B.K.) Vaughn,<br><i>Myrcianthes fragrans</i> (Sw.) McVaugh | Lanche                |               |                   | 33          | 33          | 1716          | 1716          |
| <b>MYRTACEAE</b>      | <i>Psidium guajava</i> L.                                                                 | Guanabana             | Costa         | Chiclayo          | 233         | 233         | 12116         | 12116         |
| <b>NYCTAGINACEAE</b>  | <i>Mirabilis jalapa</i> L.                                                                | Buenas Tardes         |               |                   | 12          | 12          | 624           | 624           |
| <b>OLACACEAE</b>      | <i>Heisteria acuminata</i> (H. & B.) Engler                                               | Chuchuasi             | Sierra        |                   | 86          | 86          | 4472          | 4472          |
| <b>OLACACEAE</b>      | <i>Ximenia americana</i> L.                                                               | Limoncillo            | Sierra        | Otuzco            | 29          | 29          | 1508          | 1508          |
| <b>OLEACEAE</b>       | <i>Olea europaea</i> L.                                                                   | Hoja de Olivo         | Sierra        |                   | 31          | 31          | 1612          | 1612          |
| <b>ONAGRACEAE</b>     | <i>Oenothera rosea</i> Aiton                                                              | Chupa Sangre          | Sierra        |                   | 17          | 17          | 884           | 884           |
| <b>ORCHIDACEAE</b>    | <i>Aa paleacea</i> (H.B.K.) Rchb. f.                                                      | Hierba de la Soledad  | Sierra        |                   | 7           | 7           | 364           | 364           |
| <b>ORCHIDACEAE</b>    | <i>Lycaste gigantea</i> Lindl.                                                            | Caña Caña             | Sierra        |                   | 24          | 24          | 1248          | 1248          |
| <b>ORCHIDACEAE</b>    | <i>Stelis</i> sp.                                                                         | Cucharilla            | Sierra        |                   | 19          | 19          | 988           | 988           |
| <b>ORCHIDACEAE</b>    | <i>Stelis eublepharis</i> Rchb. f.                                                        | Boton de Oro          | Costa         | Moche             | 127         | 127         | 6604          | 6604          |
| <b>OXALIDACEAE</b>    | <i>Oxalis peduncularis</i> H.B.K.                                                         | Chulco                |               |                   | 10          | 10          | 520           | 520           |
| <b>PAPAVERACEAE</b>   | <i>Argemone mexicana</i> L.                                                               | Cardo Santo           | Sierra        |                   | 34          | 34          | 1768          | 1768          |
| <b>PASSIFLORACEAE</b> | <i>Passiflora caerulea</i> L.                                                             | Pasionara             | Sierra        |                   | 14          | 14          | 728           | 728           |
| <b>PASSIFLORACEAE</b> | <i>Passiflora ligularis</i> Jus.                                                          | Cascara de Granadilla | Costa         | Northern Chiclayo | 67          | 67          | 3484          | 3484          |
| <b>PASSIFLORACEAE</b> | <i>Passiflora quardrangularis</i> L.                                                      | Tumbo                 | Sierra        |                   | 13          | 13          | 676           | 676           |
| <b>PHYTOLACCACEAE</b> | <i>Petiveria alliacea</i> L.                                                              | Mucura                | Costa         | Moche             | 60          | 60          | 3120          | 3120          |
| <b>PHYTOLACCACEAE</b> | <i>Phytolacca bogotensis</i> H.B.K.                                                       | Ilambo                | Sierra        | Otuzco            | 35          | 35          | 1820          | 1820          |

|                       |                                                                            |                               |                          |                   |             |             |              |              |
|-----------------------|----------------------------------------------------------------------------|-------------------------------|--------------------------|-------------------|-------------|-------------|--------------|--------------|
| PHYTOLACCACEAE        | <i>Phytolacca rivinoides</i><br>Kunth & Bouché                             | Guaylango                     | Sierra                   |                   | 7           | 7           | 364          | 364          |
| PHYTOLACCACEAE        | <i>Phytolacca weberbaueri</i> H.<br>Walter                                 | Santo Tome                    | Sierra                   |                   | 14          | 14          | 728          | 728          |
| <b>PINACEAE</b>       | <b><i>Pinus patula</i> Schldl. &amp;<br/>Cham.</b>                         | <b>Pino</b>                   |                          |                   | <b>10</b>   | <b>10</b>   | <b>520</b>   | <b>520</b>   |
| PIPERACEAE            | <i>Peperomia fraseri</i> C. DC.                                            | Hierba de la<br>Plata         | Sierra                   |                   | 68          | 68          | 3536         | 3536         |
| PIPERACEAE            | <i>Peperomia galioides</i> H.B.K.                                          | Congonilla                    | Sierra                   |                   | 7           | 7           | 364          | 364          |
| PIPERACEAE            | <i>Peperomia inaequalifolia</i><br>R. & P.                                 | Congona                       | Sierra                   | Otusco,<br>Uzquil | 289         | 289         | 15028        | 15028        |
| PIPERACEAE            | <b><i>Piper aduncum</i> L.</b>                                             | <b>Matico</b>                 | <b>Costa</b>             | <b>Chiclayo</b>   | <b>1680</b> | <b>1680</b> | <b>87360</b> | <b>87360</b> |
| PIPERACEAE            | <i>Piper</i> cf. <i>aequale</i> Vahl.                                      | Mogoquero                     | Sierra                   |                   | 21          | 21          | 1092         | 1092         |
| <b>PLANTAGINACEAE</b> | <b><i>Plantago major</i> L.</b>                                            | <b>Llantén</b>                | <b>Costa</b>             | <b>Moche</b>      | <b>840</b>  | <b>840</b>  | <b>43680</b> | <b>43680</b> |
| PLANTAGINACEAE        | <i>Plantago sericea</i> R. & P.<br>subsp. <i>sericans</i> (Pilger)<br>Rahn | Paja Blanca                   | Sierra                   |                   | 24          | 24          | 1248         | 1248         |
| PLANTAGINACEAE        | <i>Plantago sericea</i> R. & P.<br>var. <i>lanuginosa</i> Grieseb.         | Pajilla Blanca                | Sierra                   | Otuzco            | 12          | 12          | 624          | 624          |
| POACEAE               | <b><i>Cymbopogon citratus</i><br/>(DC.) Stapf.</b>                         | <b>Hierba Luisa</b>           | <b>Costa,<br/>Sierra</b> | <b>Trujillo</b>   | <b>816</b>  | <b>816</b>  | <b>42432</b> | <b>42432</b> |
| <b>POACEAE</b>        | <b><i>Cynodon dactylon</i> (L.)<br/>Persoon</b>                            | <b>Gramma Dulce</b>           | <b>Costa</b>             | <b>Moche</b>      | <b>404</b>  | <b>404</b>  | <b>21008</b> | <b>21008</b> |
| <b>POACEAE</b>        | <b><i>Hordeum vulgare</i> L.</b>                                           | <b>Cebada</b>                 |                          |                   | <b>10</b>   | <b>10</b>   | <b>520</b>   | <b>520</b>   |
| <b>POACEAE</b>        | <b><i>Olyra latifolia</i> L.</b>                                           | <b>Cuña - Cuña</b>            |                          |                   | <b>10</b>   | <b>10</b>   | <b>520</b>   | <b>520</b>   |
| <b>POACEAE</b>        | <b><i>Triticum sativum</i> L.</b>                                          | <b>Trigo</b>                  | <b>Sierra</b>            |                   | <b>7</b>    | <b>7</b>    | <b>364</b>   | <b>364</b>   |
| <b>POACEAE</b>        | <b><i>Zea mays</i> L.</b>                                                  | <b>Chingo</b>                 | <b>Sierra</b>            |                   | <b>27</b>   | <b>27</b>   | <b>1404</b>  | <b>1404</b>  |
| POLEMONIACEAE         | <i>Cantua quercifolia</i> Jus.                                             | Dormidero                     | Sierra                   |                   | 7           | 7           | 364          | 364          |
| POLYGALACEAE          | <i>Polygala paniculata</i> L.                                              | Canchalagua<br>Grande         |                          |                   | 10          | 10          | 520          | 520          |
| POLYGONACEAE          | <i>Polygonum<br/>hydropiperoides</i> Michaux                               | Hierba de Pica<br>Flor        | Sierra                   |                   | 21          | 21          | 1092         | 1092         |
| POLYPODIACEAE         | <i>Cheilanthes myriophylla</i><br>Desv.                                    | Hierba del<br>Dominio         | Sierra                   |                   | 7           | 7           | 364          | 364          |
| POLYPODIACEAE         | <i>Notholaena nivea</i> (Poir.)<br>Desv.                                   | Doradilla                     | Sierra                   | Cajamarca         | 74          | 74          | 3848         | 3848         |
| POLYPODIACEAE         | <i>Polypodium crasifolium</i> L.                                           | Lengua de<br>Ciervo           | Sierra                   | Huamachuc<br>o    | 125         | 125         | 6500         | 6500         |
| <b>PUNICACEAE</b>     | <b><i>Punica granatum</i> L.</b>                                           | <b>Cascura de<br/>Granada</b> | <b>Sierra</b>            |                   | <b>7</b>    | <b>7</b>    | <b>364</b>   | <b>364</b>   |
| RANUNCULACEAE         | <i>Laccopetalum giganteum</i>                                              | Pacra                         | Sierra                   | Huamachuc         | 292         | 292         | 15184        | 15184        |

|                         |                                                               |                  |               |                   |            |      |              |        |
|-------------------------|---------------------------------------------------------------|------------------|---------------|-------------------|------------|------|--------------|--------|
|                         | (Wedd.) Ulbrich                                               |                  |               | o                 |            |      |              |        |
| <b>ROSACEAE</b>         | <i>Cydonia oblonga</i> Miller                                 | Membrillo        | Sierra        | Sinsicap (Otuzco) | 12         | 12   | 624          | 624    |
| <b>ROSACEAE</b>         | <i>Geum peruvianum</i> Focke                                  | Valeriana        | Sierra        | Otusco            | 413        | 413  | 21476        | 21476  |
| <b>ROSACEAE</b>         | <i>Polylepis racemosa</i> R. & P.                             | Quinual          | Sierra        |                   | 48         | 48   | 2496         | 2496   |
| <b>ROSACEAE</b>         | <i>Rosa centifolia</i> L.                                     | Rosa de Castilla | Costa         | Moche             | 73         | 73   | 3796         | 3796   |
| <b>ROSACEAE</b>         | <i>Rubus robustus</i> C. Presl.                               | Zarzamora        | Sierra        | Otusco            | 171        | 171  | 8892         | 8892   |
| <b>ROSACEAE</b>         | <i>Sanguisorba minor</i> Scop.                                | Pimpinela        | Sierra        | Otusco            | 663        | 663  | 34476        | 34476  |
| <b>RUBIACEAE</b>        | <i>Cinchona</i> spp.                                          | Cascarilla       | Sierra        |                   | 67         | 67   | 3484         | 3484   |
| <b>RUBIACEAE</b>        | <i>Uncaria guianensis</i> (Aubl.) Gmelin                      | Paraguay         | Sierra        |                   | 21         | 21   | 1092         | 1092   |
| <b>RUBIACEAE</b>        | <i>Uncaria tomentosa</i> (Willdenow ex Roemer & Schultes) DC. | Uña de Gato      | Selva         |                   | 4530       | 4530 | 235560       | 235560 |
| <b>RUBICEAE</b>         | <i>Coffea arabica</i> L.                                      | Café             | Sierra        |                   | 7          | 7    | 364          | 364    |
| <b>RUIACEAE</b>         | <i>Morinda citrifolia</i> L.                                  | Noni             |               | France            | 27 bottles | 1350 | 1404 bottles | 70200  |
| <b>RUTACEAE</b>         | <i>Citrus aurantium</i> L.                                    | Hoja de Naranja  | Sierra        |                   | 35         | 35   | 1820         | 1820   |
| <b>RUTACEAE</b>         | <i>Citrus medica</i> L.                                       | Cidra            | Sierra        |                   | 7          | 7    | 364          | 364    |
| <b>RUTACEAE</b>         | <i>Gardenia augusta</i> (L.) Merr.                            | Margarita        | Montaña       | Jaén              | 10         | 10   | 520          | 520    |
| <b>RUTACEAE</b>         | <i>Ruta graveolens</i> L.                                     | Ruda             | Costa, Sierra | Santa Rosa        | 2013       | 2013 | 104676       | 104676 |
| <b>SALICACEAE</b>       | <i>Salix chilensis</i> Molina                                 | Sauce            | Costa         | Trujillo          | 35         | 35   | 1820         | 1820   |
| <b>SAPINDACEAE</b>      | <i>Dodonaea viscosa</i> Jacq.                                 | Chamana          | Sierra        |                   | 36         | 36   | 1872         | 1872   |
| <b>SAPINDACEAE</b>      | <i>Sapindus saponaria</i> L.                                  | Checo            | Sierra        |                   | 12         | 12   | 624          | 624    |
| <b>SAPOTACEAE</b>       | <i>Pouteria lucuma</i> (R. & P.) Kuntze                       | Lucumo           | Costa         | Morropon          | 10         | 10   | 520          | 520    |
| <b>SAXIFRAGACEAE</b>    | <i>Escallonia pendula</i> (R. & P.) Pers.                     | Chachacon        | Sierra        | Otusco, Uzquil    | 24         | 24   | 1248         | 1248   |
| <b>SAXIFRAGACEAE</b>    | <i>Escobedia grandiflora</i> (L.f.) Kuntze                    | Suna             | Sierra        |                   | 7          | 7    | 364          | 364    |
| <b>SCROPHULARIACEAE</b> | <i>Caprania peruviana</i> Bentham                             | Arenilla         | Montaña       | Iquitos           | 386        | 386  | 20072        | 20072  |
| <b>SCROPHULARIACEAE</b> | <i>Escobedia grandiflora</i> (L.f.) Kuntze                    | Azafran          | Costa         | Moche             | 12         | 12   | 624          | 624    |
| <b>SCROPHULARIACEAE</b> | <i>Galvesia fruticosa</i> J. Gmelin                           | Curil            | Sierra        |                   | 7          | 7    | 364          | 364    |
| <b>SMILACACEAE</b>      | <i>Smilax kunthii</i> Killip & Morton                         | Palo de la China | Sierra        |                   | 17         | 17   | 884          | 884    |

|                         |                                                       |                      |                        |                |            |            |              |              |
|-------------------------|-------------------------------------------------------|----------------------|------------------------|----------------|------------|------------|--------------|--------------|
| <b>SMILACACEAE</b>      | <i>Smilax medica</i> M.Martens & Galeotti             | Zarzaparilla         | Sierra                 |                | 61         | 61         | 3172         | 3172         |
| <b>SOLANACEAE</b>       | <i>Brugmansia arborea</i> (L.) Lagerheim              | Micha Rastrera       | Sierra                 |                | 105        | 105        | 5460         | 5460         |
| <b>SOLANACEAE</b>       | <i>Brugmansia candida</i> Persoon                     | Misha Blanca         |                        |                | 43         | 43         | 2236         | 2236         |
| <b>SOLANACEAE</b>       | <i>Brugmansia sanguinea</i> (R. & P.) D. Don.         | Misha Roja           |                        |                | 27         | 27         | 1404         | 1404         |
| <b>SOLANACEAE</b>       | <b><i>Cestrum auriculatum</i> L'Herit</b>             | <b>Agrasejo</b>      | <b>Costa</b>           | <b>Norte</b>   | <b>679</b> | <b>679</b> | <b>35308</b> | <b>35308</b> |
| <b>SOLANACEAE</b>       | <i>Datura ferox</i> L.                                | Chamico              | Sierra, Selva          |                | 20         | 20         | 1040         | 1040         |
| <b>SOLANACEAE</b>       | <i>Jaltomata</i> sp.                                  | Sémulo               | Sierra                 |                | 93         | 93         | 4836         | 4836         |
| <b>SOLANACEAE</b>       | <i>Juanulloa ochracea</i> Cuatrecasas                 | Cuya-Cuya            | Sierra                 | Jaen           | 41         | 41         | 2132         | 2132         |
| <b>SOLANACEAE</b>       | <i>Lycopersicon peruvianum</i> (L.) Mill.             | Tomate de Monte      | Sierra                 |                | 7          | 7          | 364          | 364          |
| <b>SOLANACEAE</b>       | <i>Nicotiana rustica</i> L.                           | Tabaco negro         |                        |                | 10         | 10         | 520          | 520          |
| <b>SOLANACEAE</b>       | <i>Nicotiana tabacum</i> L.                           | Tabaco               | Costa, Sierra, Montaña |                | 125        | 125        | 6500         | 6500         |
| <b>SOLANACEAE</b>       | <i>Solanum americanum</i> Mill.                       | Hierba Mora          | Sierra                 | Uzkil          | 27         | 27         | 1404         | 1404         |
| <b>SOLANACEAE</b>       | <i>Solanum mammosum</i> L.                            | Torosimuri           | Sierra                 |                | 7          | 7          | 364          | 364          |
| <b>STERCULIACEAE</b>    | <i>Melochia lupulina</i> Sw.                          | Chantilla            | Sierra                 |                | 19         | 19         | 988          | 988          |
| <b>STERCULIACEAE</b>    | <i>Theobroma cacao</i> L.                             | Cascara Cacao        | Sierra                 | Jaén           | 7          | 7          | 364          | 364          |
| <b>THELYPTERIDACEAE</b> | <i>Thelypteris scalaris</i> (Christ) Alston           | Helecha Macho        | Sierra                 | Ortusco, Uzkil | 7          | 7          | 364          | 364          |
| <b>THYMELEACEAE</b>     | <i>Daphnopsis weberbaueri</i> Domke                   | Cholitos             | Sierra                 | Pucallpa       | 7          | 7          | 364          | 364          |
| <b>TILIACEAE</b>        | <b><i>Tilia platyphyllos</i> L.</b>                   | <b>Tilo</b>          |                        | <b>Chile</b>   | <b>679</b> | <b>679</b> | <b>35308</b> | <b>35308</b> |
| <b>TROPAEOLACEAE</b>    | <i>Tropaeolum minus</i> L.                            | Mastuerzo            | Costa                  | Todas Costas   | 19         | 19         | 988          | 988          |
| <b>TYPHACEAE</b>        | <b><i>Typha angustifolia</i> L.</b>                   | <b>Chace</b>         |                        |                | <b>10</b>  | <b>10</b>  | <b>520</b>   | <b>520</b>   |
| <b>ULMACEAE</b>         | <i>Celtis schippii</i> Standl.                        | Palo Huaco           | Sierra                 |                | 38         | 38         | 1976         | 1976         |
| <b>URTICACEAE</b>       | <i>Pilea microphylla</i> (L.) Lieberman               | Contra Hierba        | Sierra (baja)          | Huancayo       | 47         | 47         | 2444         | 2444         |
| <b>URTICACEAE</b>       | <b><i>Urtica magellanica</i> A. Jussieu ex Poiret</b> | <b>Hortiga Comun</b> | <b>Sierra</b>          | <b>Otuzco</b>  | <b>526</b> | <b>526</b> | <b>27352</b> | <b>27352</b> |
| <b>URTICACEAE</b>       | <i>Urtica</i> spp.                                    | Hortiga de Leon      | Sierra                 | Otuzco         | 10         | 10         | 520          | 520          |
| <b>VALERIANACEAE</b>    | <i>Phyllactis rigida</i> (R. & P.) Persoon            | Hierba de Estrella   |                        |                | 33         | 33         | 1716         | 1716         |

|                       |                                              |                                   |                  |                    |            |            |              |              |
|-----------------------|----------------------------------------------|-----------------------------------|------------------|--------------------|------------|------------|--------------|--------------|
| <b>VALERIANACEAE</b>  | <i>Valeriana plantaginea</i><br>Kunth        | Hornamo<br>Morada                 |                  |                    | 20         | 20         | 1040         | 1040         |
| <b>VERBENACEAE</b>    | <i>Aloysia triphylla</i> (L. Her.)<br>Britt. | <b>Cedron</b>                     | <b>Sierra</b>    | <b>Otusco</b>      | <b>480</b> | <b>480</b> | <b>24960</b> | <b>24960</b> |
| <b>VERBENACEAE</b>    | <i>Clerodendron</i> sp.                      | Brochamelia                       | Costa            | Moche              | 73         | 73         | 3796         | 3796         |
| <b>VERBENACEAE</b>    | <i>Lippia alba</i> (L.) N.E. Br.             | Mestruante                        |                  |                    | 12         | 12         | 624          | 624          |
| <b>VERBENACEAE</b>    | <i>Verbena littoralis</i> H.B.K.             | Verbena                           | Costa,<br>Sierra | Moche              | 72         | 72         | 3744         | 3744         |
| <b>VIOLACEAE</b>      | <i>Viola tricolor</i> L.                     | <b>Hierba del<br/>Pensamiento</b> | <b>Sierra</b>    | <b>Otusco</b>      | <b>97</b>  | <b>97</b>  | <b>5044</b>  | <b>5044</b>  |
| <b>XYRIDACEAE</b>     | <i>Xyris subulata</i> R. & P.                | Hierba del<br>Caballero           |                  |                    | 10         | 10         | 520          | 520          |
| <b>ZYGOPHYLLACEAE</b> | <i>Tribulus terrestris</i> L.                | Carizo                            | Costa            | Moche              | 30         | 30         | 1560         | 1560         |
| <b>INDET.</b>         |                                              | 7 condores                        | Sierra           |                    | 7          | 7          | 364          | 364          |
| <b>INDET.</b>         |                                              | 7 hornamos                        | Sierra           |                    | 7          | 7          | 364          | 364          |
| <b>INDET.</b>         |                                              | 7 michas                          | Sierra           |                    | 14         | 14         | 728          | 728          |
| <b>INDET.</b>         |                                              | 7 trinzias                        | Sierra           |                    | 7          | 7          | 364          | 364          |
| <b>INDET.</b>         |                                              | Adan y Eva                        | Sierra           |                    | 7          | 7          | 364          | 364          |
| <b>INDET.</b>         |                                              | Ajojero                           | Sierra           |                    | 7          | 7          | 364          | 364          |
| <b>INDET.</b>         |                                              | Alquitecta                        | Sierra           |                    | 10         | 10         | 520          | 520          |
| <b>INDET.</b>         |                                              | Barbasco                          |                  | Iquitos            | 10         | 10         | 520          | 520          |
| <b>INDET.</b>         |                                              | Cachorillo                        | Sierra           |                    | 7          | 7          | 364          | 364          |
| <b>INDET.</b>         |                                              | Candelilla                        | Sierra           |                    | 7          | 7          | 364          | 364          |
| <b>INDET.</b>         |                                              | Casiburon                         | Sierra           | Otusco             | 24         | 24         | 1248         | 1248         |
| <b>INDET.</b>         |                                              | Cembraca                          | Sierra           |                    | 7          | 7          | 364          | 364          |
| <b>INDET.</b>         |                                              | Cerrilla                          | Sierra           |                    | 7          | 7          | 364          | 364          |
| <b>INDET.</b>         |                                              | Cestisa                           | Sierra           |                    | 7          | 7          | 364          | 364          |
| <b>INDET.</b>         |                                              | Chapuro                           |                  |                    | 12         | 12         | 624          | 624          |
| <b>INDET.</b>         |                                              | Chichiricoma                      | Sierra           | Loreto,<br>Iquitos | 24         | 24         | 1248         | 1248         |
| <b>INDET.</b>         |                                              | Chiricana                         | Sierra           |                    | 7          | 7          | 364          | 364          |
| <b>INDET.</b>         |                                              | Chuchocon                         | Sierra           |                    | 27         | 27         | 1404         | 1404         |
| <b>INDET.</b>         |                                              | Estrellado                        | Sierra           |                    | 34         | 34         | 1768         | 1768         |
| <b>INDET.</b>         |                                              | Guancabomba                       | Sierra           |                    | 24         | 24         | 1248         | 1248         |
| <b>INDET.</b>         |                                              | Guayaba                           | Sierra           |                    | 7          | 7          | 364          | 364          |
| <b>INDET.</b>         |                                              | Hierba Chicla                     | Sierra           |                    | 7          | 7          | 364          | 364          |
| <b>INDET.</b>         |                                              | Hierba de<br>Carillo              | Sierra           |                    | 7          | 7          | 364          | 364          |
| <b>INDET.</b>         |                                              | Hierba de<br>Conocimiento         | Sierra           |                    | 7          | 7          | 364          | 364          |
| <b>INDET.</b>         |                                              | Hierba de                         |                  |                    | 10         | 10         | 520          | 520          |

|        |  |                  |        |                   |    |    |      |      |
|--------|--|------------------|--------|-------------------|----|----|------|------|
|        |  | Floracimiento    |        |                   |    |    |      |      |
| INDET. |  | Hierba de Laguna | Sierra |                   | 7  | 7  | 364  | 364  |
| INDET. |  | Hierba de Shingo |        |                   | 12 | 12 | 624  | 624  |
| INDET. |  | Hierba de Venado | Sierra |                   | 12 | 12 | 624  | 624  |
| INDET. |  | Hierba del Amor  |        |                   | 10 | 10 | 520  | 520  |
| INDET. |  | Hierbas Fuertes  | Sierra |                   | 7  | 7  | 364  | 364  |
| INDET. |  | Hoja de Abedul   | Sierra | Otusco            | 48 | 48 | 2496 | 2496 |
| INDET. |  | Hoja Milagrosa   | Sierra |                   | 7  | 7  | 364  | 364  |
| INDET. |  | Huarate          | Sierra | Sinsicap (Otuzco) | 55 | 55 | 2860 | 2860 |
| INDET. |  | Juaraquice       | Sierra |                   | 7  | 7  | 364  | 364  |
| INDET. |  | Llamera          |        |                   | 10 | 10 | 520  | 520  |
| INDET. |  | Madudes          | Sierra |                   | 7  | 7  | 364  | 364  |
| INDET. |  | Maiz Micha       | Sierra |                   | 7  | 7  | 364  | 364  |
| INDET. |  | Mandragora       | Sierra |                   | 7  | 7  | 364  | 364  |
| INDET. |  | Mano Poderosa    | Sierra |                   | 7  | 7  | 364  | 364  |
| INDET. |  | Mezclados        |        |                   | 10 | 10 | 520  | 520  |
| INDET. |  | Michiyo          | Sierra |                   | 7  | 7  | 364  | 364  |
| INDET. |  | Mishquina        | Sierra |                   | 7  | 7  | 364  | 364  |
| INDET. |  | Neumoscada       | Sierra |                   | 7  | 7  | 364  | 364  |
| INDET. |  | Orel             | Sierra |                   | 7  | 7  | 364  | 364  |
| INDET. |  | Paígosa          | Sierra |                   | 19 | 19 | 988  | 988  |
| INDET. |  | Palo Hueso       | Sierra |                   | 7  | 7  | 364  | 364  |
| INDET. |  | Paraja           |        |                   | 12 | 12 | 624  | 624  |
| INDET. |  | Parasaumar       |        |                   | 20 | 20 | 1040 | 1040 |
| INDET. |  | Pata Fina        |        |                   | 10 | 10 | 520  | 520  |
| INDET. |  | Poleo de Pasma   | Sierra |                   | 7  | 7  | 364  | 364  |
| INDET. |  | Pusunga          |        |                   | 10 | 10 | 520  | 520  |
| INDET. |  | Queraños         | Sierra |                   | 7  | 7  | 364  | 364  |
| INDET. |  | Río Barbo        | Sierra | Iquitos           | 17 | 17 | 884  | 884  |
| INDET. |  | Ruminaria        |        |                   | 10 | 10 | 520  | 520  |
| INDET. |  | Seroyil          | Sierra |                   | 7  | 7  | 364  | 364  |
| INDET. |  | Shivahuaco       | Sierra |                   | 7  | 7  | 364  | 364  |
| INDET. |  | Siete Raices     |        |                   | 10 | 10 | 520  | 520  |

|        |  |               |        |  |                   |                                    |      |                                     |
|--------|--|---------------|--------|--|-------------------|------------------------------------|------|-------------------------------------|
| INDET. |  | Sola Juato    | Sierra |  | 7                 | 7                                  | 364  | 364                                 |
| INDET. |  | Te Amargo     | Sierra |  | 7                 | 7                                  | 364  | 364                                 |
| INDET. |  | Tepa Magallon | Sierra |  | 24                | 24                                 | 1248 | 1248                                |
| INDET. |  | Yorba         | Sierra |  | 14                | 14                                 | 728  | 728                                 |
| INDET. |  | Zarzachina    | Sierra |  | 7                 | 7                                  | 364  | 364                                 |
|        |  |               |        |  |                   |                                    |      |                                     |
|        |  |               |        |  | Total soles       | 71552                              |      | 3721172                             |
|        |  |               |        |  |                   | 650.55 per vendor per week         |      | 33828.83 per vendor per year        |
|        |  |               |        |  | <b>Total US\$</b> | <b>22790.13 per week</b>           |      | <b>1185086.62 per year</b>          |
|        |  |               |        |  |                   | <b>207.18 per vendor per week</b>  |      | <b>10773.52 per vendor per year</b> |
|        |  |               |        |  |                   | <b>91160.51 per month</b>          |      |                                     |
|        |  |               |        |  |                   | <b>828.73 per vendor per month</b> |      |                                     |
